# Supplementary material for: H3PW12O40/Co3O4–Cu2S as a low-cost counter electrode catalyst for quantum dot-sensitized solar cells
Source: Royal Society of Chemistry journal article supplement (doi:10.1039/d0nj00500b), 2020-01-01
Supplement: d0nj00500b1.pdf [file d0nj00500b1.pdf]

## Supporting Information

### **H<sub>3</sub>PW<sub>12</sub>O<sub>40</sub>/Co<sub>3</sub>O<sub>4</sub>-Cu<sub>2</sub>S as a low-cost counter electrode catalyst for quantum dots-sensitized solar cells**

Yi Yang, Qiu Zhang, Fengyan Li,\* Zhinan Xia, Lin Xu\*

*Key Laboratory of Polyoxometalate Science of Ministry of Education, Department of Chemistry, Northeast Normal University, Changchun, Jilin 130024, P. R. China*

Corresponding authors Tel.: +86 431 85099765; Fax: +86 431 85099765.

E-mail addresses: [lify525@nenu.edu.cn](mailto:lify525@nenu.edu.cn); [linxu@nenu.edu.cn](mailto:linxu@nenu.edu.cn)

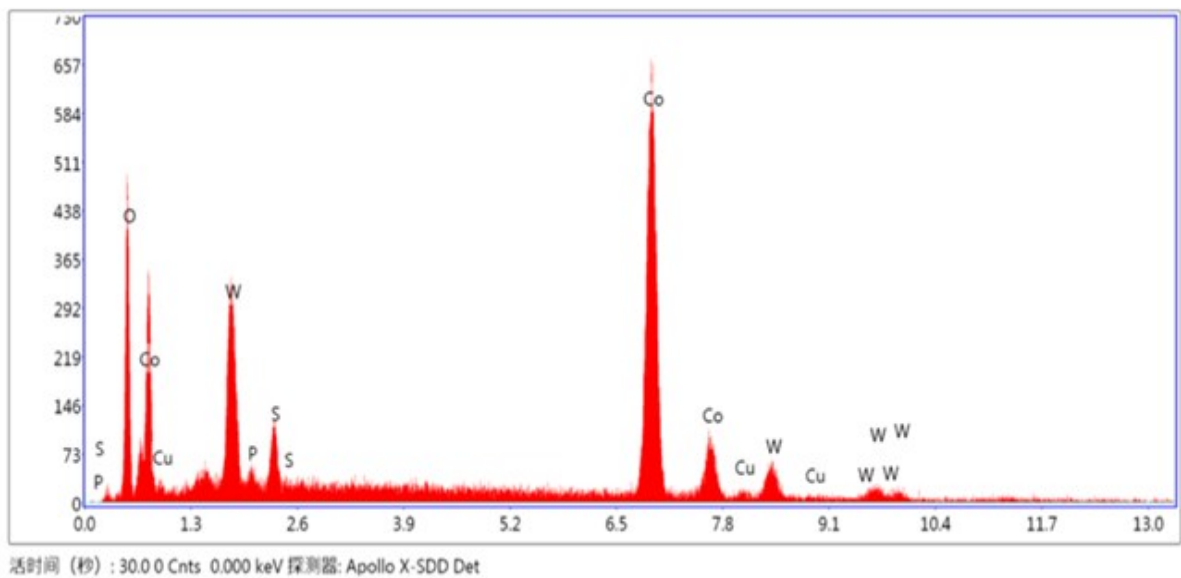

**Fig. S1** EDX diagram of  $PW_{12}/Co_3O_4-Cu_2S$  film.

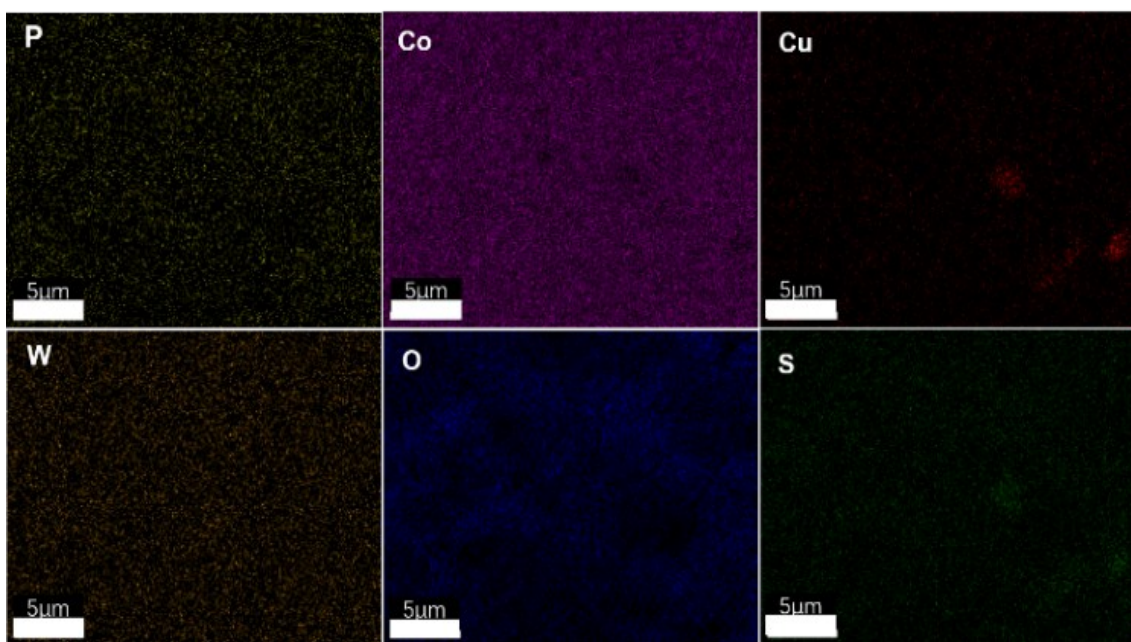

**Fig. S2** EDX elemental mappings P, W, Co, O, Cu and S in  $PW_{12}/Co_3O_4-Cu_2S$  film.

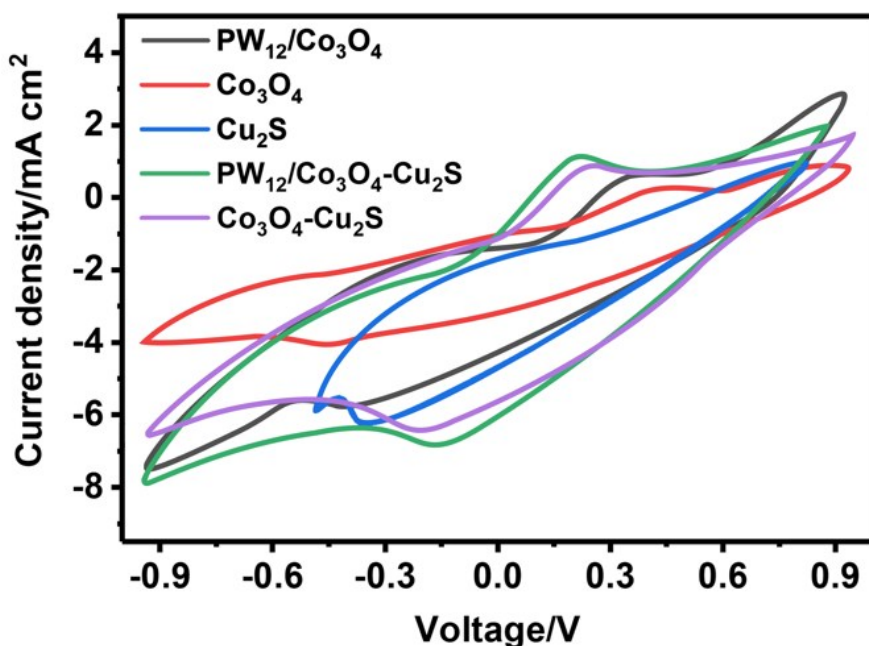

Fig. S3. CV curves of different counter electrodes in the three-electrode system.

To evaluate the electrocatalytic activities, the cyclic voltammetry (CV) measurement were performed over  $\text{Co}_3\text{O}_4$ ,  $\text{PW}_{12}/\text{Co}_3\text{O}_4$ ,  $\text{Cu}_2\text{S}$ ,  $\text{Co}_3\text{O}_4\text{-Cu}_2\text{S}$ ,  $\text{PW}_{12}/\text{Co}_3\text{O}_4\text{-Cu}_2\text{S}$  counter electrodes, respectively (Fig. S3). The CV curves could indicate the catalytic reaction at the interface of the CE/electrolyte. The reduction of  $\text{S}_x^{2-}$  ions lead to the negative currents, while the positive currents result from the oxidation of  $\text{S}^{2-}$  ions. Furthermore, the reduction peak current is the most important, which largely reflects the catalytic ability of CE for  $\text{S}_x^{2-}$ -reduction in the QDSSCs.<sup>1</sup> Peak to peak separation ( $E_{pp}$ ) is also crucial parameters for evaluating the catalytic performance of the counter electrode.<sup>2</sup> From the curves, compared with other counter electrodes, the composite  $\text{PW}_{12}/\text{Co}_3\text{O}_4\text{-Cu}_2\text{S}$  counter electrodes have higher peak current and minimum  $E_{pp}$ , suggesting that the composite counter electrodes have better electrocatalytic performance.

#### Reference

1. M. Yeh, L. Lin, C. Lee, C. Chou, K. Tsai and J. Ho, High performance CdS quantum-dot-sensitized solar cells with Ti-based ceramic materials as catalysts on the counter electrode, *Journal of Power Sources*, 2013, **237**, 141-148.
2. L. Chen, W. Chen and E. Wang, Graphene with cobalt oxide and tungsten carbide as a low-cost counter electrode catalyst applied in Pt-free dye-sensitized solar cells, *Journal of Power Sources*, 2018, **380**, 18-25.
